# Supplementary material for: Computational methods for the prediction of chromatin interaction and organization using sequence and epigenomic profiles
Source: PubMed Central journal article supplement — Brief Bioinform. 2021 Jan 18;22(5):bbaa405. doi: 10.1093/bib/bbaa405 (PMC8424394; doi:10.1093/bib/bbaa405), 2021-01-18
Supplement: supplementary_1125_revised_bbaa405.pdf [file supplementary_1125_revised_bbaa405.pdf]

## Supplementary Materials for

### Computational methods for the prediction of chromatin interaction and organization using sequence and epigenomic profiles

Huan Tao <sup>1,†</sup>, Hao Li <sup>1,†</sup>, Kang Xu <sup>1</sup>, Hao Hong <sup>1</sup>, Shuai Jiang <sup>1</sup>, Guifang Du <sup>1</sup>, Junting Wang <sup>1</sup>, Yu Sun <sup>1</sup>, Xin Huang <sup>1</sup>, Yang Ding <sup>1</sup>, Fei Li <sup>2</sup>, Xiaofei Zheng <sup>1,\*</sup>, Hebing Chen <sup>1,\*</sup> and Xiaochen Bo <sup>1,\*</sup>

1 Beijing Institute of Radiation Medicine, Beijing 100850, China.

2 Computer Network Information Center, Chinese Academy of Sciences, Beijing 100190, China.

\* To whom correspondence should be addressed. Tel: +8601066932251; Email: boxc@bmi.ac.cn (X.B.).

Correspondence may also be addressed to chb-1012@163.com (H.C.) and xfzheng100@126.com (X.Z.).

†The authors wish it to be known that, in their opinion, the first two authors should be regarded as Joint First Authors.

#### The PDF file includes:

Table S1. Code availability of computational methods for the prediction of chromatin interaction and organization.

Table S2. Required input data of computational methods for the prediction of chromatin interaction and organization.

Table S3. Databases of available predictions supplied by computational methods.

**Table S1 Code availability of computational methods for the prediction of chromatin interaction and organization**

| Tool Name                                                                | URLs                                                                                                                                                                             | Implementation |
|--------------------------------------------------------------------------|----------------------------------------------------------------------------------------------------------------------------------------------------------------------------------|----------------|
| <b>Computational methods for the prediction of chromatin interaction</b> |                                                                                                                                                                                  |                |
| <b>Unsupervised Methods</b>                                              |                                                                                                                                                                                  |                |
| PreSTIGE                                                                 | <a href="http://prestige.case.edu">http://prestige.case.edu</a>                                                                                                                  | Web software   |
| ABC                                                                      | <a href="https://github.com/broadinstitute/ABC-Enhancer-Gene-Prediction">https://github.com/broadinstitute/ABC-Enhancer-Gene-Prediction</a>                                      | Python         |
| Ernst et al.                                                             | /                                                                                                                                                                                | /              |
| Thurman et al.                                                           | /                                                                                                                                                                                | /              |
| ELMER                                                                    | <a href="https://github.com/lijingya/ELMER">https://github.com/lijingya/ELMER</a><br><a href="http://bioconductor.org/packages/ELMER">http://bioconductor.org/packages/ELMER</a> | R              |
| Naville et al.                                                           | <a href="https://github.com/DyogenIBENS/Regulus">https://github.com/DyogenIBENS/Regulus</a>                                                                                      | Python         |
| CISMAPPER                                                                | /                                                                                                                                                                                | /              |
| Cicero                                                                   | <a href="https://github.com/cole-trapnell-lab/cicero-release">https://github.com/cole-trapnell-lab/cicero-release</a>                                                            | R              |
| C3D                                                                      | <a href="https://github.com/LupienLab/C3D">https://github.com/LupienLab/C3D</a>                                                                                                  | BASH and R     |
| EpiTensor                                                                | /                                                                                                                                                                                | MACS2          |
| CITD                                                                     | <a href="https://cb.utdallas.edu/CITD/index.htm">https://cb.utdallas.edu/CITD/index.htm</a>                                                                                      | /              |
| SWIPE-NMF                                                                | <a href="https://github.com/kaiyuanmifen/SWIPE-NMF">https://github.com/kaiyuanmifen/SWIPE-NMF</a>                                                                                | R              |
| <b>Supervised Methods</b>                                                |                                                                                                                                                                                  |                |
| JEME                                                                     | <a href="https://github.com/yiplabcuhk/JEME/">https://github.com/yiplabcuhk/JEME/</a>                                                                                            | R, Weka        |
| FOCS                                                                     | <a href="https://github.com/Shamir-Lab/FOCS">https://github.com/Shamir-Lab/FOCS</a>                                                                                              | R              |
| IM-PET                                                                   | <a href="http://www.healthcare.uiowa.edu/labs/tan/IM-PET_Package.tgz">www.healthcare.uiowa.edu/labs/tan/IM-PET_Package.tgz</a>                                                   | /              |
| RIPPLE                                                                   | <a href="http://pages.discovery.wisc.edu/~sroy/ripple/download.html">http://pages.discovery.wisc.edu/~sroy/ripple/download.html</a>                                              | C++, Matlab    |
| PETModule                                                                | <a href="http://hulab.ucf.edu/research/projects/PETModule/">http://hulab.ucf.edu/research/projects/PETModule/</a>                                                                | Python         |
| TargetFinder                                                             | <a href="https://github.com/shwhalen/targetfinder">https://github.com/shwhalen/targetfinder</a>                                                                                  | Python         |
| McEnhancer                                                               | <a href="https://ohlerlab.mdc-berlin.de/software/McEnhancer_134/">https://ohlerlab.mdc-berlin.de/software/McEnhancer_134/</a>                                                    | Python         |
| CISD                                                                     | <a href="https://github.com/huizhangucas/CISD">https://github.com/huizhangucas/CISD</a>                                                                                          | BASH, R        |
| EP_Bayes                                                                 | <a href="https://github.com/ManchesterBioinference/EP_Bayes">https://github.com/ManchesterBioinference/EP_Bayes</a>                                                              | Python, R      |

|                 |                                                                                                                                                                                                            |                 |
|-----------------|------------------------------------------------------------------------------------------------------------------------------------------------------------------------------------------------------------|-----------------|
| 3DEpiLoop       | <a href="https://bitbucket.org/4dnucleome/3depiloop">https://bitbucket.org/4dnucleome/3depiloop</a>                                                                                                        | R               |
| Multi-levels 3D | /                                                                                                                                                                                                          | /               |
| CRUP            | <a href="https://github.com/VerenaHeinrich/CRUP">https://github.com/VerenaHeinrich/CRUP</a><br><a href="https://zenodo.org/record/3469676#.XzOQyDMpWmQ">https://zenodo.org/record/3469676#.XzOQyDMpWmQ</a> | R               |
| EAGLE           | <a href="https://github.com/EvansGao/EAGLE">https://github.com/EvansGao/EAGLE</a>                                                                                                                          | Perl, Matlab    |
| DeepTACT        | /                                                                                                                                                                                                          | /               |
| EPIP            | <a href="http://www.cs.ucf.edu/~xiaoman/EPIP/">http://www.cs.ucf.edu/~xiaoman/EPIP/</a>                                                                                                                    | Python          |
| 3DPredictor     | <a href="https://github.com/labdevgen/3Dpredictor">https://github.com/labdevgen/3Dpredictor</a>                                                                                                            | Python, R, Java |
| PEP             | <a href="http://acgt.cs.tau.ac.il/focs">http://acgt.cs.tau.ac.il/focs</a>                                                                                                                                  | Python          |
| EPIANN          | <a href="https://github.com/wgmao/EPIANN">https://github.com/wgmao/EPIANN</a>                                                                                                                              | Python, R       |
| EP2vec          | <a href="https://github.com/wanwenzeng/ep2vec">https://github.com/wanwenzeng/ep2vec</a>                                                                                                                    | Python          |
| SPEID           | <a href="https://github.com/macompbio/">https://github.com/macompbio/</a>                                                                                                                                  | Python          |
| EnContact       | <a href="https://github.com/liwenran/EnContact">https://github.com/liwenran/EnContact</a>                                                                                                                  | Python          |

---

#### Computational methods for the prediction of chromatin organization

---

##### Loops

---

|           |                                                                                             |            |
|-----------|---------------------------------------------------------------------------------------------|------------|
| CISD-loop | <a href="https://github.com/huizhangucas/CISD">https://github.com/huizhangucas/CISD</a>     | BASH and R |
| CTCF-MP   | <a href="https://github.com/ma-compbio/CTCF-MP">https://github.com/ma-compbio/CTCF-MP</a>   | Python     |
| Lollipop  | <a href="https://github.com/ykai16/Lollipop">https://github.com/ykai16/Lollipop</a>         | Python     |
| DeepMILO  | <a href="https://github.com/khuranalab/DeepMILO">https://github.com/khuranalab/DeepMILO</a> | Python     |

##### TADs

---

|             |                                                                                                               |        |
|-------------|---------------------------------------------------------------------------------------------------------------|--------|
| CITD        | <a href="https://cb.utdallas.edu/CITD/index.htm">https://cb.utdallas.edu/CITD/index.htm</a>                   | /      |
| PGSA        | /                                                                                                             | /      |
| TAD-Lactuca | <a href="https://github.com/LoopGan/TAD-Lactuca">https://github.com/LoopGan/TAD-Lactuca</a>                   | Python |
| nTDP        | <a href="http://www.cs.cmu.edu/~ckingsf/research/ntdp">http://www.cs.cmu.edu/~ckingsf/research/ntdp</a>       | Python |
| BART        | <a href="https://github.com/huangjialiangan/HubPredictor">https://github.com/huangjialiangan/HubPredictor</a> | R      |

##### Contact map

---

|          |   |   |
|----------|---|---|
| Rambutan | / | / |
|----------|---|---|

|              |                                                                                                                                                                                                  |                                |
|--------------|--------------------------------------------------------------------------------------------------------------------------------------------------------------------------------------------------|--------------------------------|
| Farré et al. | Keras package ( <a href="https://github.com/keras-team/keras">https://github.com/keras-team/keras</a> ) TensorFlow<br>( <a href="https://www.tensorflow.org/">https://www.tensorflow.org/</a> ). | Python                         |
| Akita        | <a href="https://github.com/calico/basenji/tree/master/manuscripts/akita">https://github.com/calico/basenji/tree/master/manuscripts/akita</a>                                                    | Python                         |
| DeepC        | <a href="https://github.com/rschwess/deepC">https://github.com/rschwess/deepC</a>                                                                                                                | Python, tensorflow, R and Perl |

---

### 3D structures

---

|                              |                                                                                                                                                                                             |                                                  |
|------------------------------|---------------------------------------------------------------------------------------------------------------------------------------------------------------------------------------------|--------------------------------------------------|
| MiChroM                      | /                                                                                                                                                                                           | /                                                |
| HiP-HoP                      | <a href="https://www.sciencedirect.com/science/article/pii/S1097276518307871?via%3Dihub#sec4.1c">https://www.sciencedirect.com/science/article/pii/S1097276518307871?via%3Dihub#sec4.1c</a> | LAMMPS, Bowtie2, SAMtools, BEDtools, MACS2. etc. |
| Chromatin states-based model | <a href="https://github.com/ZhangGroup-MITChemistry/DRAGON">https://github.com/ZhangGroup-MITChemistry/DRAGON</a>                                                                           | LAMMPS                                           |
| Bkhetan et al.               | /                                                                                                                                                                                           | /                                                |

---

**Table S2 Required input data of computational methods for the prediction of chromatin interaction and organization**

|                                                                          | DNA sequence | DNA methylation | Distance | CTCF | Cohesin | p300 | RNAP II | TF binding | Chromatin Accessibility |          |           |           | Histone Marks |          |         |          | TAD | HiC      | Gene Expression |
|--------------------------------------------------------------------------|--------------|-----------------|----------|------|---------|------|---------|------------|-------------------------|----------|-----------|-----------|---------------|----------|---------|----------|-----|----------|-----------------|
|                                                                          |              |                 |          |      |         |      |         |            | DHS                     | ATAC-seq | MNase-seq | FAIRE-seq | H3K4me1       | H3K4me3  | H3K27ac | Other    |     |          |                 |
| <b>Computational methods for the prediction of chromatin interaction</b> |              |                 |          |      |         |      |         |            |                         |          |           |           |               |          |         |          |     |          |                 |
| PreSTIGE                                                                 |              |                 | √        | √    |         |      |         |            |                         |          |           |           | √             |          |         |          |     | √        |                 |
| ABC                                                                      |              |                 | √        | √    |         |      |         |            | √                       | <i>N</i> |           |           |               |          | √       |          |     | <i>/</i> | <i>/</i>        |
| Ernst et al.                                                             |              |                 | √        | √    |         |      | √       | √          |                         |          |           |           | √             | √        | √       | √        |     |          | √               |
| Thurman et al.                                                           |              | √               | √        |      |         |      |         | √          | √                       |          |           |           |               | √        |         |          |     |          | √               |
| ELMER                                                                    |              | √               |          |      |         |      |         |            |                         |          |           |           |               |          |         |          |     |          | √               |
| Naville et al.                                                           |              |                 | √        |      |         | √    |         | √          | √                       |          |           |           | √             | √        | √       |          |     |          |                 |
| CISMAPPER                                                                |              |                 | <i>/</i> |      |         |      |         | √          |                         |          |           |           |               | <i>/</i> | √       | <i>/</i> |     |          | √               |
| Cicero                                                                   |              |                 | √        |      |         |      |         |            |                         | √        |           |           |               |          |         |          |     |          |                 |
| C3D                                                                      |              |                 |          |      |         |      |         |            | √                       |          |           |           |               |          |         |          |     |          |                 |
| EpiTensor                                                                |              |                 |          |      |         |      |         |            | √                       |          |           |           | √             | √        | √       | √        | √   |          | √               |
| CITD                                                                     |              |                 |          | √    |         |      |         | √          |                         |          |           |           | √             | √        | √       | √        |     |          | √               |
| SWIPE-NMF                                                                |              |                 |          | √    |         |      |         | √          | √                       |          |           |           | √             | √        | √       | √        | √   | √        | √               |
| JEME                                                                     |              | √               | √        |      |         |      |         |            | √                       |          |           |           | √             | √        | √       |          |     |          | √               |
| FOCS                                                                     |              | √               | √        |      |         |      |         |            | √                       |          |           |           |               |          |         |          |     |          | √               |
| IM-PET                                                                   | √            |                 | √        |      |         | √    |         | √          | <i>/</i>                |          |           |           | √             | √        | √       |          |     |          | √               |
| RIPPLE                                                                   |              |                 |          |      |         |      |         | √          | √                       |          |           |           | √             | √        | √       | √        |     |          | √               |
| PETModule                                                                |              |                 | √        |      |         | √    |         | √          | √                       |          |           |           |               |          |         |          |     |          |                 |
| TargetFinder                                                             |              | √               |          | √    | √       | √    |         | √          | √                       |          |           | √         | √             | √        | √       | √        |     |          | √               |



|                                  |   |  |  |   |   |  |   |   |   |   |  |  |   |   |   |   |  |  |  |
|----------------------------------|---|--|--|---|---|--|---|---|---|---|--|--|---|---|---|---|--|--|--|
| TAD–Lactuca                      | √ |  |  | √ |   |  |   |   |   |   |  |  | √ | √ | √ | √ |  |  |  |
| nTDP                             |   |  |  |   |   |  |   |   | / |   |  |  | √ | √ | / | √ |  |  |  |
| BART                             | / |  |  | √ |   |  |   |   |   |   |  |  | √ | √ | √ | √ |  |  |  |
| Rambutan                         | √ |  |  |   |   |  |   |   | √ |   |  |  |   |   |   |   |  |  |  |
| Farré et al.                     | √ |  |  | √ |   |  | √ | √ |   |   |  |  | √ | √ | √ | √ |  |  |  |
| Akita                            | √ |  |  |   |   |  |   |   |   |   |  |  |   |   |   |   |  |  |  |
| DeepC                            | √ |  |  |   |   |  |   |   |   |   |  |  |   |   |   |   |  |  |  |
| MiChroM                          |   |  |  |   |   |  |   |   |   |   |  |  | √ | √ | √ | √ |  |  |  |
| HiP-HoP                          |   |  |  | √ | / |  |   |   |   | √ |  |  |   |   | √ |   |  |  |  |
| Chromatin states-<br>Based model |   |  |  | √ | / |  |   |   | √ |   |  |  | √ | √ | √ | √ |  |  |  |
| Bkhetan et al.                   | √ |  |  | √ | √ |  | / | √ |   |   |  |  | √ | √ |   | √ |  |  |  |

( / presents optional, /√ presents or )

**Table S3 Databases of available predictions supplied by computational methods**

---

| <b>Number</b> | <b>Tool Name</b> | <b>Brief Description</b>                                                                                                                                                                                                                        | <b>URLs</b>                                                                                                                                                                   |
|---------------|------------------|-------------------------------------------------------------------------------------------------------------------------------------------------------------------------------------------------------------------------------------------------|-------------------------------------------------------------------------------------------------------------------------------------------------------------------------------|
| 1             | PreSTIGE         | Predicted enhancer-gene pairs for 13 cell lines                                                                                                                                                                                                 | <a href="https://genetics.cwru.edu/prestige/">https://genetics.cwru.edu/prestige/</a>                                                                                         |
| 2             | JEME             | Enhancer-promoter network in 935 samples of human primary cells, tissues and cell lines                                                                                                                                                         | <a href="http://yiplab.cse.cuhk.edu.hk/jeme/">http://yiplab.cse.cuhk.edu.hk/jeme/</a>                                                                                         |
| 3             | FOCS             | Extensive enhancer-promotor maps of 2630 samples taken from ENCODE, Roadmap Epigenomics, FANTOM5, and a new compendium of GRO-seq                                                                                                               | <a href="http://acgt.cs.tau.ac.il/focs/">http://acgt.cs.tau.ac.il/focs/</a>                                                                                                   |
| 4             | EnContact        | 1,545,180 positive EEI predicted in seven cell lines                                                                                                                                                                                            | <a href="https://github.com/liwenran/EnContact">https://github.com/liwenran/EnContact</a>                                                                                     |
| 5             | EAGLE            | 7,680,203 enhancer-gene interactions involving 31,375 genes and 138,547 enhancers across 89 tissue/cell types in mouse; 7,437,255 enhancer-gene interactions involving 43,724 genes and 177,062 enhancers across 110 tissue/cell types in human | <a href="https://enhanceratlas.org/">https://enhanceratlas.org/</a>                                                                                                           |
| 6             | CITD             | Chromatin interaction, topological domains and their states on 100 cell types from ENCODE and Roadmap with different resolutions                                                                                                                | <a href="https://cb.utdallas.edu/CITD/index.htm">https://cb.utdallas.edu/CITD/index.htm</a>                                                                                   |
| 7             | PETModule        | Predicted ETGs in 8 human cells and 2 mouse cells                                                                                                                                                                                               | <a href="http://hulab.ucf.edu/research/projects/PETModule/">http://hulab.ucf.edu/research/projects/PETModule/</a>                                                             |
| 8             | SWIPE-NMF        | Enhancer-promoter network in 127 human cell lines                                                                                                                                                                                               | <a href="https://dataverse.harvard.edu/dataset.xhtml?persistentId=doi:10.7910/DVN/DNBBB2">https://dataverse.harvard.edu/dataset.xhtml?persistentId=doi:10.7910/DVN/DNBBB2</a> |

---
